# Supplementary material
Source: publisher site journal article supplement (http://www.kjim.org/upload/media/kjim-2023-323-Supplementary-Table-1.pdf)
Supplement: Supplementary file 1 [file kjim-2023-323-Supplementary-Table-1.pdf]

**Supplementary Table 1. Comparison of clinical characteristics between the patients with low TMTV (< 457.0 cm<sup>3</sup>) and the patients with high TMTV (≥ 457.0 cm<sup>3</sup>)**

| Variable                | High TMTV (n = 46) | Low TMTV (n = 80) | p value |
|-------------------------|--------------------|-------------------|---------|
| Age, yr                 | 69.0 (24.0–84.0)   | 65.0 (17.0–85.0)  | 0.289   |
| Sex                     |                    |                   | 0.446   |
| Male                    | 26 (56.5)          | 52 (65.0)         |         |
| Female                  | 20 (43.5)          | 28 (35.0)         |         |
| Histologic subtypes     |                    |                   | 0.514   |
| PTCL-NOS                | 15 (32.6)          | 34 (42.5)         |         |
| ALCL, ALK (+)           | 4                  | 7                 |         |
| ALCL, ALK (-)           | 4                  | 8                 |         |
| AITL                    | 18 (39.1)          | 28 (35.0)         |         |
| EATL                    | 2 (4.3)            | 2 (2.5)           |         |
| HSTL                    | 1 (2.2)            | 0 (0.0)           |         |
| MEITL                   | 0 (0.0)            | 0 (0.0)           |         |
| Subtype not classified  | 2 (4.3)            | 1 (1.3)           |         |
| ECOG PS                 |                    |                   | 0.001   |
| 0–1                     | 27 (58.7)          | 69 (86.3)         |         |
| ≥ 2                     | 19 (41.3)          | 11 (13.8)         |         |
| Ann arbor stage         |                    |                   | > 0.999 |
| I–II                    | 4 (8.7)            | 25 (31.2)         |         |
| III–IV                  | 42 (91.3)          | 55 (68.8)         |         |
| Increased LDH           | 38 (82.6)          | 36 (45.0)         | < 0.001 |
| Bone marrow involvement | 17 (37.0)          | 18 (22.5)         | 0.100   |
| B-symptom               | 19 (41.3)          | 16 (20.0)         | 0.002   |
| Extranodal site > 1     | 27 (58.7)          | 18 (22.5)         | 0.001   |
| Bulky mass > 8 cm       | 3 (6.5)            | 6 (7.5)           | 1.000   |
| IPI                     |                    |                   | < 0.001 |
| Low (0–1)               | 2 (4.4)            | 32 (40.0)         |         |
| Low-intermediate (2)    | 8 (17.4)           | 16 (20.0)         |         |
| High-intermediate (3)   | 15 (32.6)          | 22 (27.5)         |         |
| High (4–5)              | 21 (45.6)          | 10 (12.6)         |         |
| PIT                     |                    |                   | 0.004   |
| 0                       | 1 (2.2)            | 32 (40.0)         |         |
| 1                       | 12 (26.1)          | 30 (37.5)         |         |
| 2                       | 18 (39.1)          | 12 (15.0)         |         |
| 3–4                     | 15 (32.6)          | 6 (7.5)           |         |
| 1st line treatment      |                    |                   | 0.050   |
| CHOP                    | 29 (63.0)          | 38 (47.5)         |         |
| CHOEP                   | 16 (34.8)          | 42 (52.5)         |         |
| Alemtuzumab-CHOP        | 1 (2.2)            | 0 (0.0)           |         |

Values are presented as median (range) or number (%).

TMTV, total metabolic tumor volume; PTCL-NOS, peripheral T-cell lymphoma-not otherwise specified; ALCL, anaplastic large cell lymphoma; ALK, anaplastic lymphoma kinase; AITL, angioimmunoblastic T-cell lymphoma; EATL, enteropathy-associated T-cell lymphoma; HSTL, hepatosplenic T-cell lymphoma; MEITL, monomorphic epitheliotropic intestinal T-cell lymphoma; ECOG PS, Eastern cooperative oncology group performance status; LDH, lactate dehydrogenase; IPI, International prognostic index; PIT, prognostic index for T-cell lymphoma; CHOP, cyclophosphamide, doxorubicin, vincristine, and prednisolone; CHOEP, cyclophosphamide, doxorubicin, vincristine, etoposide, and prednisolone.
